# Supplementary material
Source: HighWire-hosted journal article supplement (https://bjsm.bmj.com/content/bjsports-2023-107388)

# FUNBALL

## Balance exercises

### a. Single leg stance

- 2x 30 seconds (on each leg)

|  |  |  |  |  |  |
|--|--|--|--|--|--|
|  |  |  |  |  |  |
|--|--|--|--|--|--|

### b. Y-Balance exercise

- 3x 6 repetitions (on each leg)
- 3x 6 repetitions (on each leg)
- 3x 6 repetitions (on each leg)
- 3x 8 repetitions (on each leg)
- 3x 8 repetitions (on each leg)
- 3x 8 repetitions (on each leg)

|  |  |  |  |  |  |
|--|--|--|--|--|--|
|  |  |  |  |  |  |
|--|--|--|--|--|--|

## Core stability

### a. Plank and Side plank

- 2x 20 seconds (on each plank position)
- 2x 20 seconds
- 2x 30 seconds
- 2x 30 seconds
- 2x 40 seconds
- 2x 40 seconds

|  |  |  |  |  |  |
|--|--|--|--|--|--|
|  |  |  |  |  |  |
|--|--|--|--|--|--|

### b. Straight arm plank

- 2x 8 repetitions
- 2x 8 repetitions
- 2x 10 repetitions
- 2x 10 repetitions
- 2x 12 repetitions
- 2x 12 repetitions

|  |  |  |  |  |  |
|--|--|--|--|--|--|
|  |  |  |  |  |  |
|--|--|--|--|--|--|

## Hamstring eccentrics

### a. Nordic hamstring

- 1x 3-5 repetitions
- 1x 6-8 repetitions
- 1x 8-10 repetitions
- 2x 6-8 repetitions
- 2x 8-10 repetitions

|  |  |  |  |  |
|--|--|--|--|--|
|  |  |  |  |  |
|--|--|--|--|--|

### b. Hamstring walk-out

- 2x 30 seconds
- 2x 30 seconds
- 2x 30 seconds
- 3x 30 seconds
- 3x 30 seconds

|  |  |  |  |  |
|--|--|--|--|--|
|  |  |  |  |  |
|--|--|--|--|--|

## Glute activation

### a. Head, Shoulder, Hip, Knee,...

- 2x 6 repetitions
- 2x 6 repetitions
- 2x 8 repetitions
- 2x 8 repetitions
- 2x 10 repetitions
- 2x 10 repetitions

|  |  |  |  |  |  |
|--|--|--|--|--|--|
|  |  |  |  |  |  |
|--|--|--|--|--|--|

### b. Squat Lunges

- 2x 8 repetitions (4 on each leg, random order)
- 2x 10 repetitions
- 2x 12 repetitions
- 3x 9 repetitions
- 3x 10 repetitions
- 3x 12 repetitions

|  |  |  |  |  |  |
|--|--|--|--|--|--|
|  |  |  |  |  |  |
|--|--|--|--|--|--|

## Plyometric exercises

### a. Forward jumps

- 4x 3 jumps
- 2x 3 jumps (on each leg)

|  |  |  |  |  |
|--|--|--|--|--|
|  |  |  |  |  |
|--|--|--|--|--|

### b. Skater jumps

- 4 repetitions
- 4 repetitions (2 on each leg)

|  |  |  |  |  |
|--|--|--|--|--|
|  |  |  |  |  |
|--|--|--|--|--|

## Running/sprinting exercises

### a. Diagonal

- 3 repetitions per pair

|  |  |  |  |  |  |
|--|--|--|--|--|--|
|  |  |  |  |  |  |
|--|--|--|--|--|--|

### b. Forward-Backward

- 3 repetitions per pair

|  |  |  |  |  |  |
|--|--|--|--|--|--|
|  |  |  |  |  |  |
|--|--|--|--|--|--|

## Games

|  |  |  |
|--|--|--|
|  |  |  |
|--|--|--|

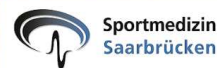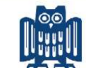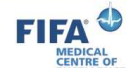

Supplement: inline-supplementary-material-2 [file inline-supplementary-material-2.pdf]
