# Supplementary material
Source: HighWire-hosted journal article supplement (https://bjsm.bmj.com/content/bjsports-2023-107388)
Supplement: inline-supplementary-material-3 [file inline-supplementary-material-3.pdf]

**SUPPLEMENTAL TABLES****Supplemental table 1** Definitions used in the data collection<sup>39</sup>

|                            |                                                                                                                                                                                                                                                                                                                                                                                                                    |
|----------------------------|--------------------------------------------------------------------------------------------------------------------------------------------------------------------------------------------------------------------------------------------------------------------------------------------------------------------------------------------------------------------------------------------------------------------|
| <b>Injury</b>              | Any physical complaint sustained by a player that results from a football match or football training, irrespective of the need for medical attention or time-loss from football activities.                                                                                                                                                                                                                        |
| <b>Injury severity</b>     | The number of days that have elapsed from the date of injury to the date of the player's return to full participation in team training and availability for match selection. <ul style="list-style-type: none"><li>▪ Minimal injury: absence for 1-3 days</li><li>▪ Mild injury: absence for 4-7 days</li><li>▪ Moderate injury: absence for 8-28 days</li><li>▪ Severe injury: absence for &gt;28 days.</li></ul> |
| <b>Mechanism of injury</b> | Traumatic: an injury resulting from a specific, identifiable event.<br>Overuse: one caused by repeated microtrauma without a single, identifiable event responsible for the injury.                                                                                                                                                                                                                                |
| <b>Training exposure</b>   | Team-based and individual physical activities under the control or guidance of the team's coaching or fitness staff that are aimed at maintaining or improving players' football skills or physical condition.                                                                                                                                                                                                     |
| <b>Match exposure</b>      | Play between teams from different clubs.                                                                                                                                                                                                                                                                                                                                                                           |

**Supplemental table 2.** Descriptive training participation and programme utilisation

| Variables                       | Overall    |
|---------------------------------|------------|
| No of training sessions         | 2224       |
| Average players attendance (SD) | 17.2 (6.1) |
| <b>Utilisation frequency</b>    |            |
| Full season, times/week (SD)    | 2.2 (0.2)  |

**Supplemental table 3.** Data on specific thigh (anterior and posterior) and knee (ACL and meniscus) injuries in the intervention and control group

|                       | Intervention group  |                     | Control group       |                     | IRR (95% CI)        | P value |
|-----------------------|---------------------|---------------------|---------------------|---------------------|---------------------|---------|
|                       | No. of injuries (%) | IR (95% CI)         | No. of injuries (%) | IR (95% CI)         |                     |         |
| <b>Thigh injuries</b> | <b>n=31</b>         |                     | <b>n=49</b>         |                     |                     |         |
| Anterior thigh        | 11 (37.9)           | 0.20 (0.11 to 0.37) | 18 (36.7)           | 0.34 (0.21 to 0.53) | 0.61 (0.28 to 1.28) | 0.18    |
| Posterior thigh       | 18 (62.1)           | 0.33 (0.21 to 0.53) | 31 (63.3)           | 0.58 (0.41 to 0.83) | 0.58 (0.32 to 1.02) | 0.06    |
| <b>Knee injuries</b>  | <b>n=26</b>         |                     | <b>n=36</b>         |                     |                     |         |
| ACL rupture           | 1 (3.8)             | 0.01 (0.00 to 0.13) | 4 (11.1)            | 0.07 (0.02 to 0.20) | 0.25 (0.02 to 2.21) | 0.21    |
| Meniscus tear         | 1 (3.8)             | 0.01 (0.00 to 0.13) | 4 (11.1)            | 0.07 (0.02 to 0.20) | 0.25 (0.02 to 2.21) | 0.21    |

- IR, incidence rates, are reported per 1000 hours of football play and are unadjusted.
- IRR, incidence rate ratios, are adjusted for team.
- CI, confidence interval.
